# Supplementary material
Source: PubMed Central journal article supplement (PMC8195260)
Supplement: NIHMS1671322-supplement-Supplemental_Material.pdf [file NIHMS1671322-supplement-Supplemental_Material.pdf]

## Supplementary Material

# Multionics-Identified Intervention to Restore Ethanol-Induced Dysregulated Proteostasis and Secondary Sarcopenia in Alcoholic Liver Disease

Shashi Shekhar Singh<sup>a</sup> Avinash Kumar<sup>a</sup> Nicole Welch<sup>a,b</sup> Jinendiran Sekar<sup>a</sup>  
Saurabh Mishra<sup>a</sup> Annette Bellar<sup>a</sup> Mahesha Gangadhariah<sup>a</sup> Amy Attaway<sup>a,c</sup>  
Hayder Al Khafaji<sup>b</sup> Xiaoqin Wu<sup>a</sup> Vai Pathak<sup>a</sup> Vandana Agrawal<sup>a</sup>  
Megan R. McMullen<sup>a</sup> Troy A. Hornberger<sup>d</sup> Laura E. Nagy<sup>a</sup> Gangarao Davuluri<sup>e</sup>  
Srinivasan Dasarathy<sup>a,b</sup>

<sup>a</sup>Department of Inflammation and Immunity, Cleveland Clinic, Cleveland, OH, USA, <sup>b</sup>Department of Gastroenterology and Hepatology, Cleveland Clinic, Cleveland, OH, USA, <sup>c</sup>Department of Pulmonology, Cleveland Clinic, Cleveland, OH, USA, <sup>d</sup>Department of Comparative Biosciences, School of Veterinary Medicine, University of Wisconsin, Madison, WI, USA, <sup>e</sup>Pennington Biomedical Research Center, Baton Rouge, LA, USA

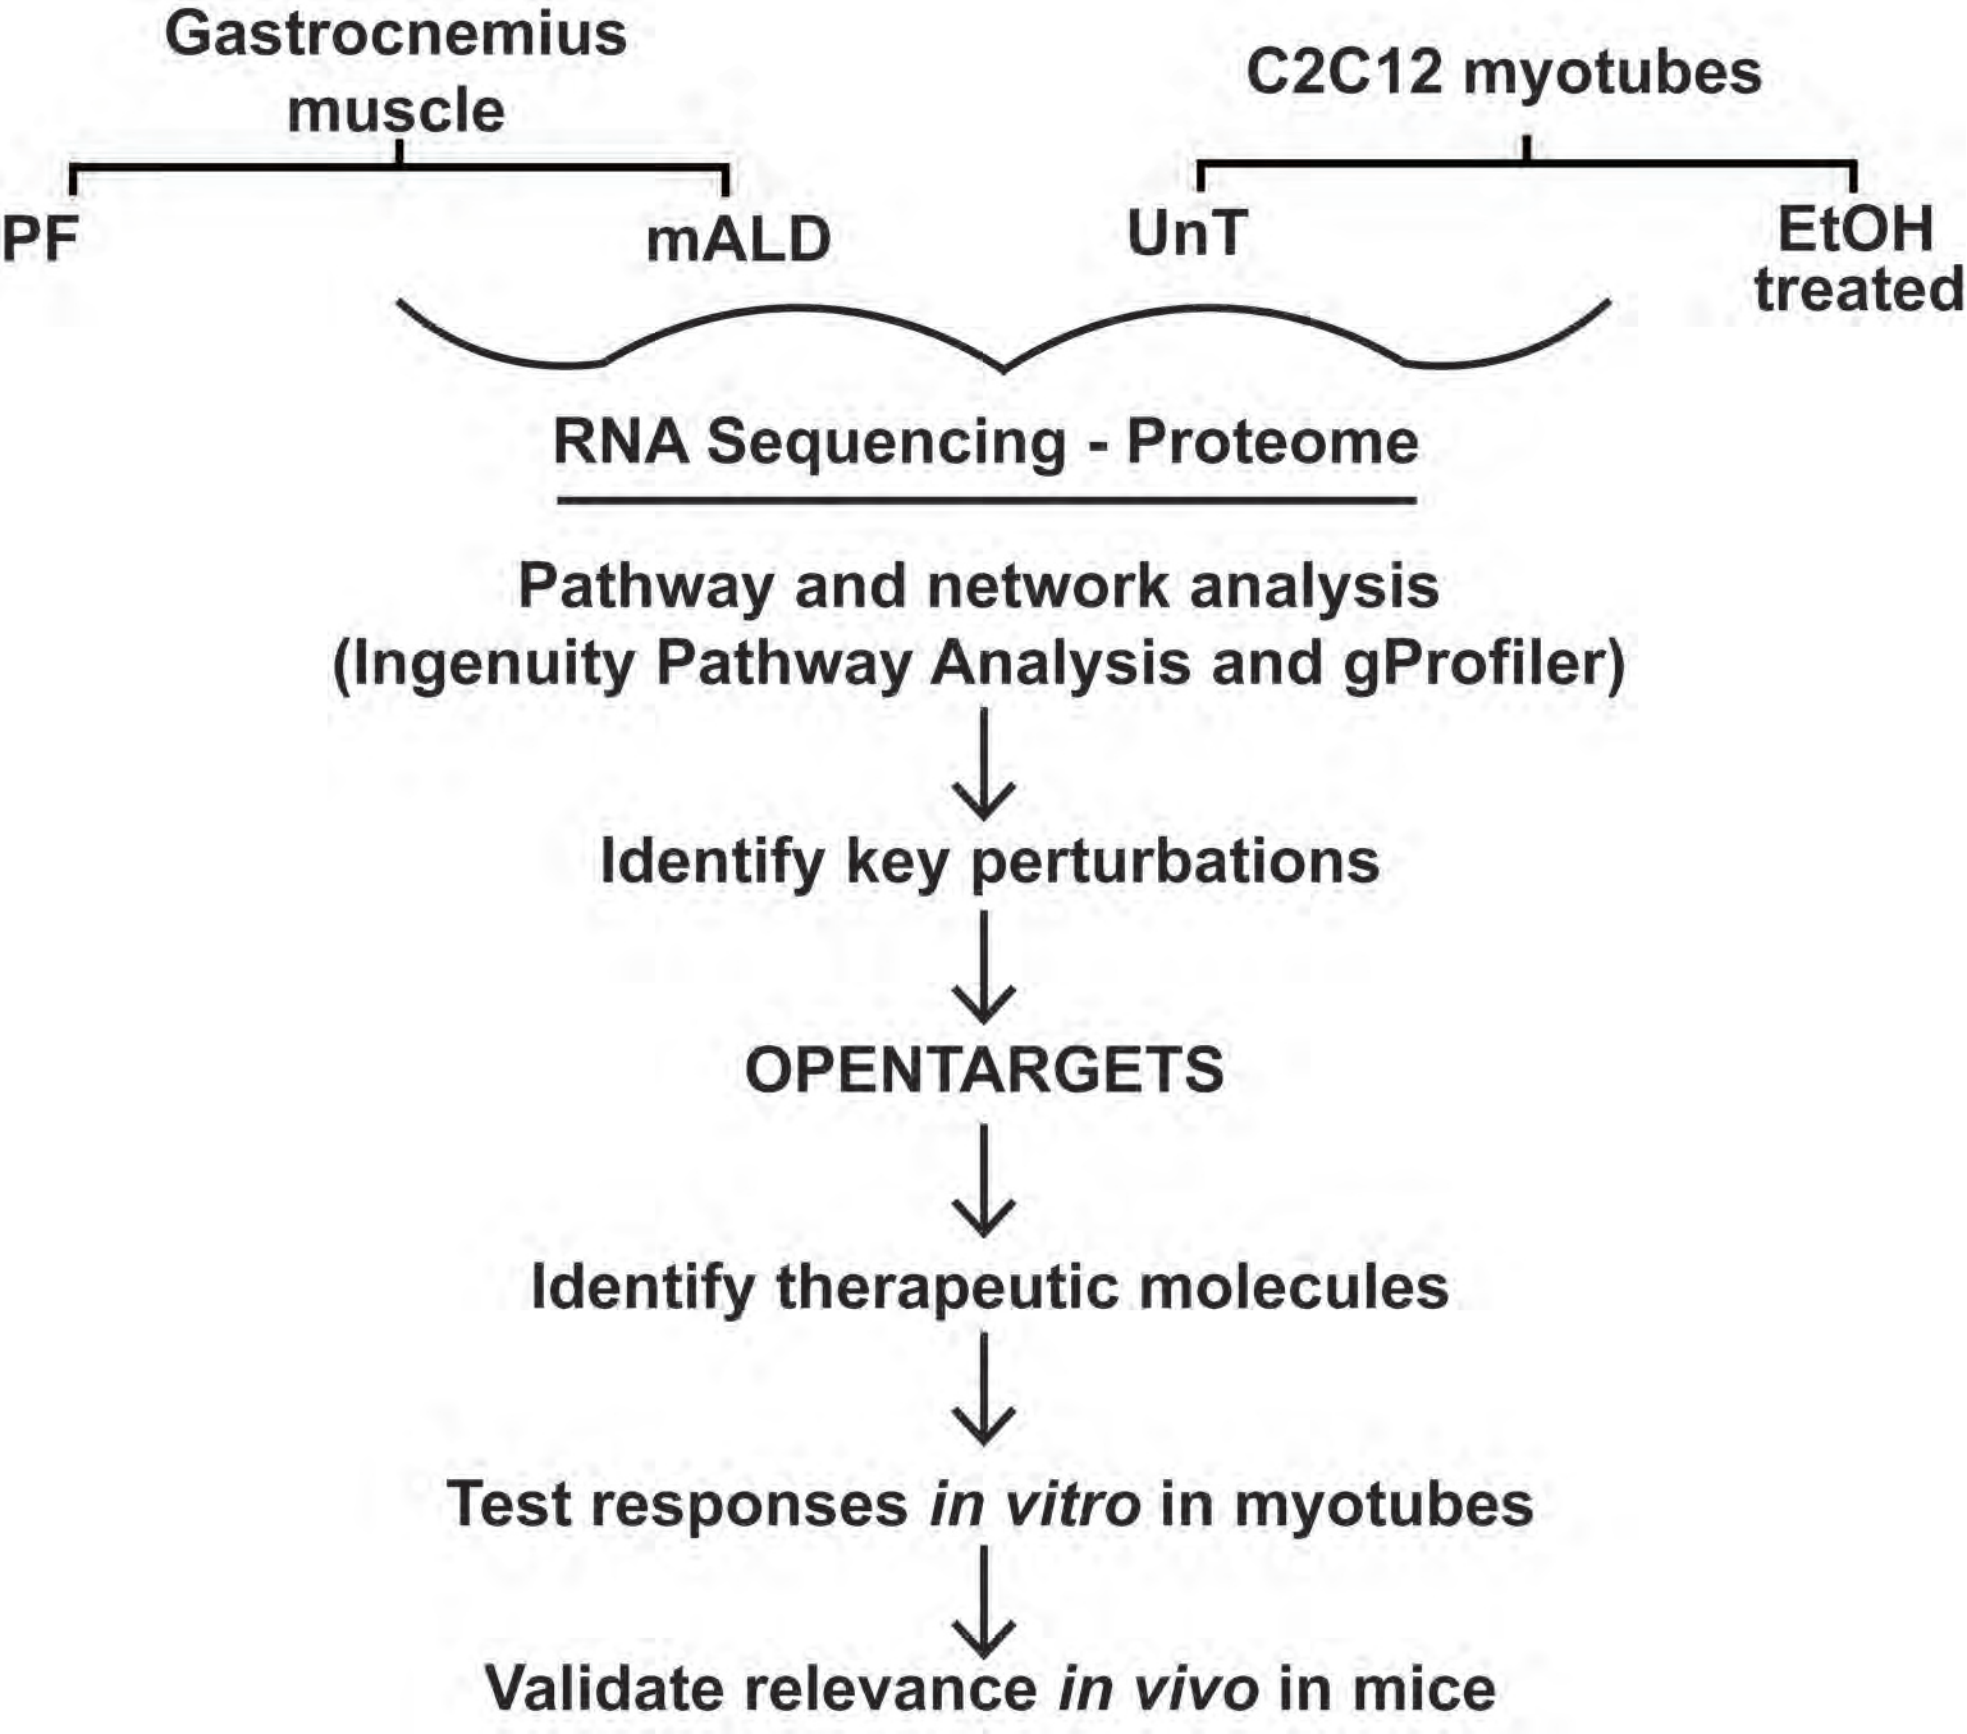

**Supplementary Figure 1. Schematic of approach.** Using a complementary bioinformatics and experimental approach, HMB was identified as a mechanism based therapeutic for sarcopenia in alcohol-related liver disease. EtOH 100 mM ethanol; mALD mouse model of alcohol related liver disease; PF pair-fed mice; UnT untreated.

**Branched chain amino acids**  
(Leucine, Isoleucine, Valine)

$\alpha$ -ketoglutarate

Glutamate

**Branched chain amino transferase (BCAT)**

**Branched chain  $\alpha$ -keto acids**

**Cytosolic KIC (KIC, KMV, KIV) dioxygenase**

CoA-SH

$\text{NAD}^+$

**Branched chain  $\alpha$ -keto dehydrogenase (BCKDH)**

$\beta$ -OH butyrate

$\text{CO}_2$

$\text{NADH}$

HMB-CoA

R-CoA/acetylCoA

Cholesterol

$\text{CO}_2/\text{H}_2\text{O}$

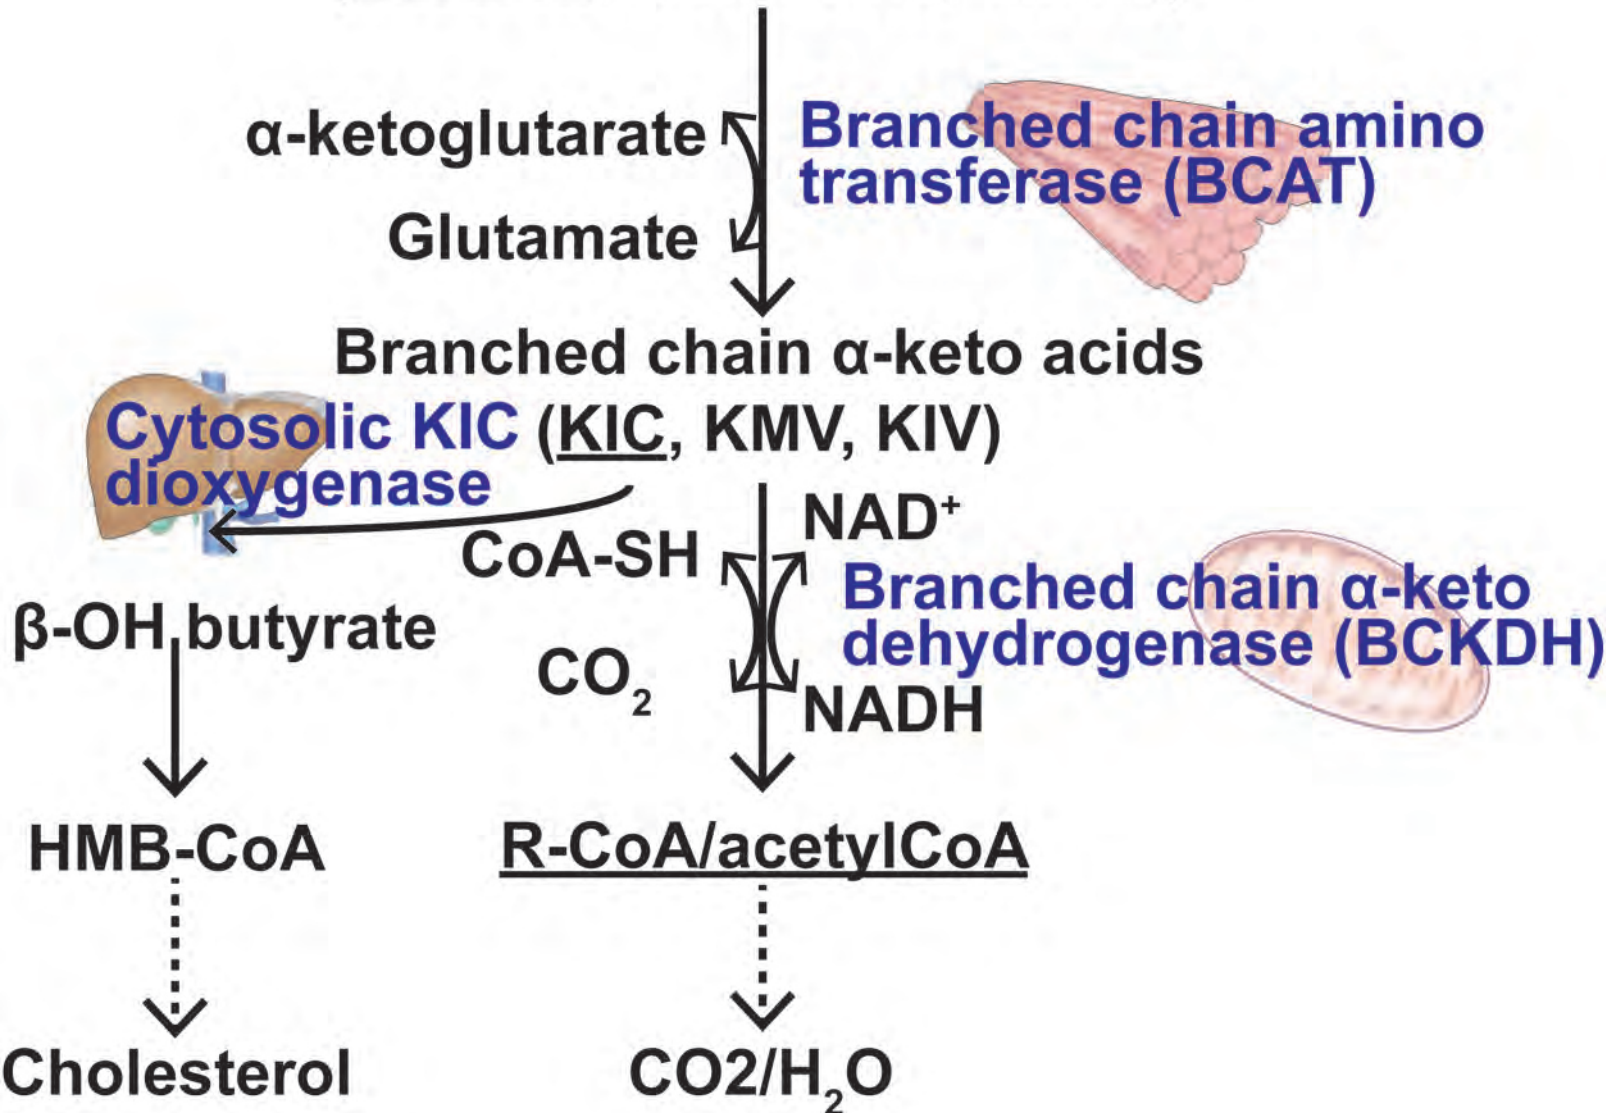

**Supplementary Figure 2. Metabolism of branched chain amino acids.** Pathways of branched chain amino acid metabolism in the skeletal muscle and generation of  $\beta$ -hydroxybutyrate in the cytosol.

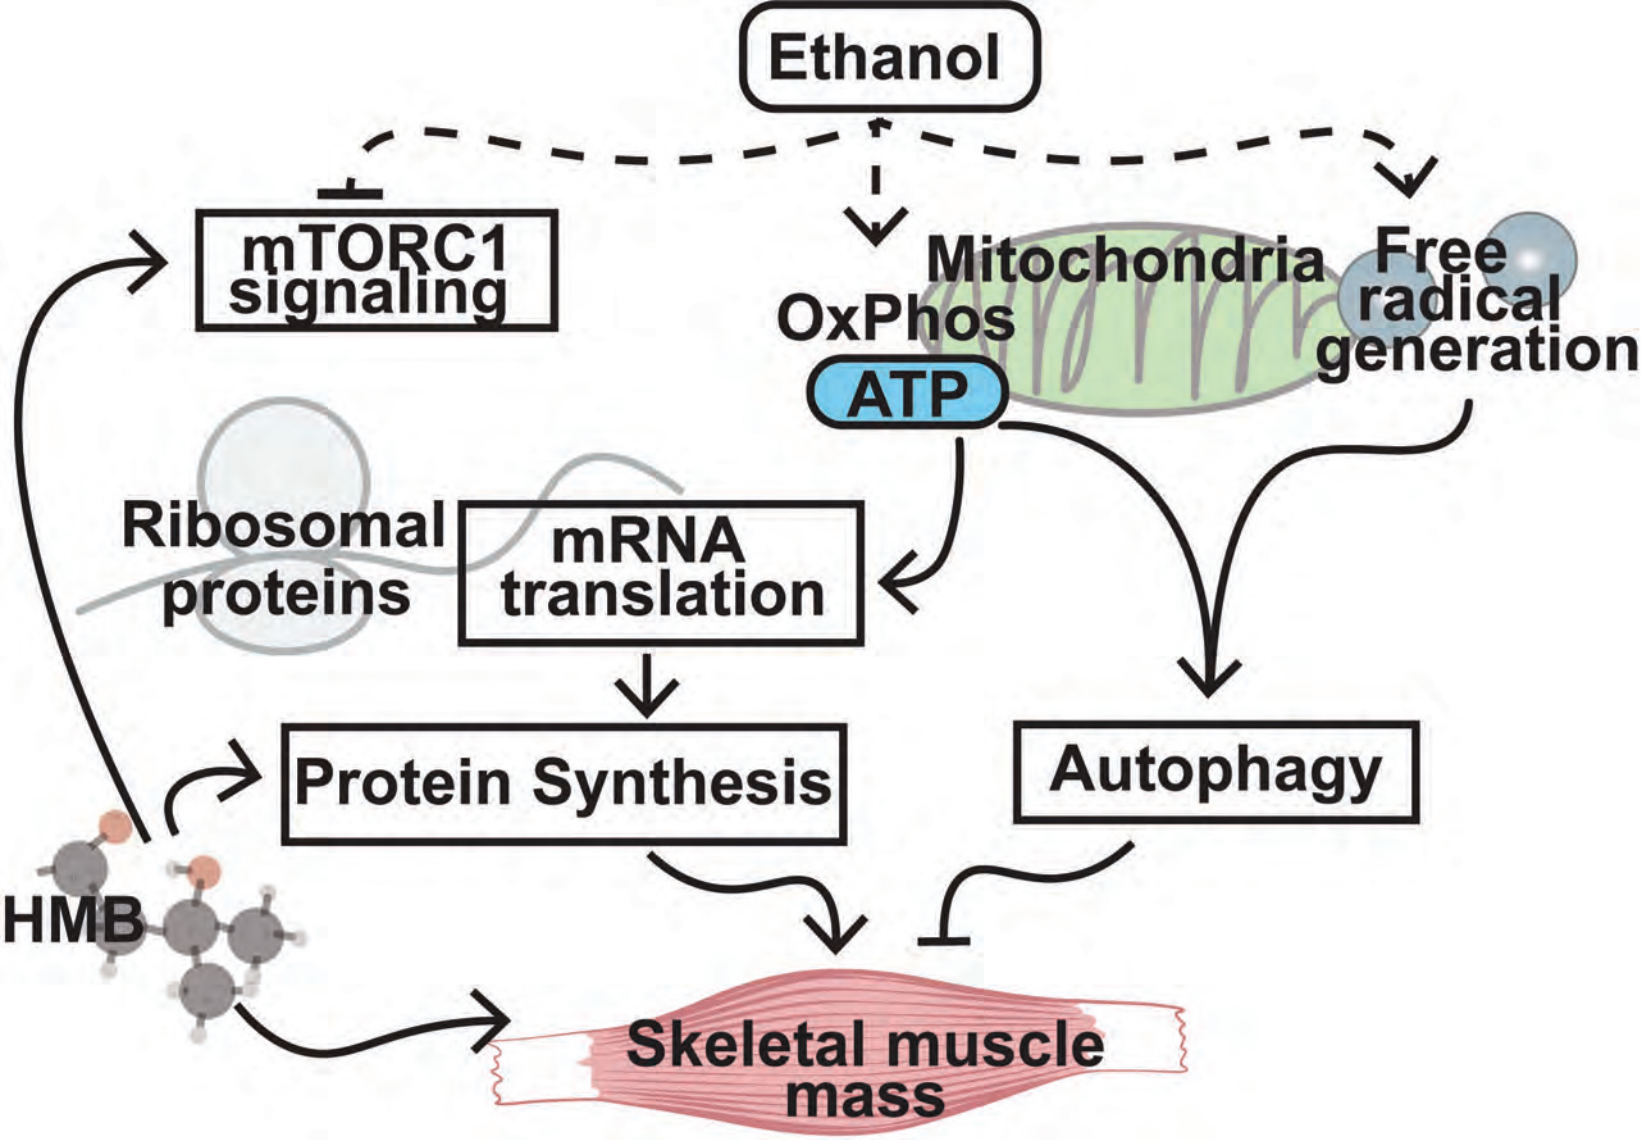

**Supplementary Fig. 3. Identification of HMB as a regulatory molecule.** Manual curation of different pathways and molecular responses to published anabolic metabolites show HMB targets ethanol-induced perturbations.

## Supplementary Tables

Due to their size, please use the following links to download and access the Supplementary Tables:

Supplementary Table 1: List of Antibodies used in HMB study.

[https://www.cellphysiolbiochem.com/Articles/000327/SM/Supplementary\\_Table\\_1.xlsx](https://www.cellphysiolbiochem.com/Articles/000327/SM/Supplementary_Table_1.xlsx)

Supplementary Table 2: C2C12 transcriptomic heatmap NW.

[https://www.cellphysiolbiochem.com/Articles/000327/SM/Supplementary\\_Table\\_2.xlsx](https://www.cellphysiolbiochem.com/Articles/000327/SM/Supplementary_Table_2.xlsx)

Supplementary Table 3: RNAseq cell mtorc pathway NW.

[https://www.cellphysiolbiochem.com/Articles/000327/SM/Supplementary\\_Table\\_3.xlsx](https://www.cellphysiolbiochem.com/Articles/000327/SM/Supplementary_Table_3.xlsx)

Supplementary Table 4: Proteomics C2C12 mtorc pathway NW.

[https://www.cellphysiolbiochem.com/Articles/000327/SM/Supplementary\\_Table\\_4.xlsx](https://www.cellphysiolbiochem.com/Articles/000327/SM/Supplementary_Table_4.xlsx)

Supplementary Table 5: IGF-1 6h EtOH v UnT RNAseq pathway NW.

[https://www.cellphysiolbiochem.com/Articles/000327/SM/Supplementary\\_Table\\_5.xlsx](https://www.cellphysiolbiochem.com/Articles/000327/SM/Supplementary_Table_5.xlsx)

Supplementary Table 6: Ubiquitination heatmap NW.

[https://www.cellphysiolbiochem.com/Articles/000327/SM/Supplementary\\_Table\\_6.xlsx](https://www.cellphysiolbiochem.com/Articles/000327/SM/Supplementary_Table_6.xlsx)

Supplementary Table 7: gProfiler\_mmusculus NW.

[https://www.cellphysiolbiochem.com/Articles/000327/SM/Supplementary\\_Table\\_7.xlsx](https://www.cellphysiolbiochem.com/Articles/000327/SM/Supplementary_Table_7.xlsx)

Supplementary Table 8: Open Targets Venn Diagram NW.

[https://www.cellphysiolbiochem.com/Articles/000327/SM/Supplementary\\_Table\\_8.xlsx](https://www.cellphysiolbiochem.com/Articles/000327/SM/Supplementary_Table_8.xlsx)

Supplementary Table 9: Mouse RNAseq Bar Graph NW.

[https://www.cellphysiolbiochem.com/Articles/000327/SM/Supplementary\\_Table\\_9.xlsx](https://www.cellphysiolbiochem.com/Articles/000327/SM/Supplementary_Table_9.xlsx)

Supplementary Table 10: BCAT data 8-10-20.

[https://www.cellphysiolbiochem.com/Articles/000327/SM/Supplementary\\_Table\\_10.xlsx](https://www.cellphysiolbiochem.com/Articles/000327/SM/Supplementary_Table_10.xlsx)

Supplementary Table 11: Biosynthesis muscle AA Table new 08-03-20 NW.

[https://www.cellphysiolbiochem.com/Articles/000327/SM/Supplementary\\_Table\\_11.docx](https://www.cellphysiolbiochem.com/Articles/000327/SM/Supplementary_Table_11.docx)

Supplementary Table 12: Degradation muscle AA Table new 08-03-20 NW.

[https://www.cellphysiolbiochem.com/Articles/000327/SM/Supplementary\\_Table\\_12.docx](https://www.cellphysiolbiochem.com/Articles/000327/SM/Supplementary_Table_12.docx)

Supplementary Table 13: Biosynthesis liver AA Table new 08-03-20 NW.

[https://www.cellphysiolbiochem.com/Articles/000327/SM/Supplementary\\_Table\\_13.docx](https://www.cellphysiolbiochem.com/Articles/000327/SM/Supplementary_Table_13.docx)

Supplementary Table 14: Degradation liver AA Table new 08-03-20 NW.

[https://www.cellphysiolbiochem.com/Articles/000327/SM/Supplementary\\_Table\\_14.docx](https://www.cellphysiolbiochem.com/Articles/000327/SM/Supplementary_Table_14.docx)
